# Supplementary material for: Hybrid Immunity Results in Enhanced and More Sustained Antibody Responses after the Second Sinovac-CoronaVac Dose in a Brazilian Cohort: DETECTCoV-19 Cohort
Source: MDPI journal article supplement (doi:10.3390/v15101987), 2023-09-23
Supplement: s1 [file s1]

**Supplementary Table S1. Characteristics and Serological testing comparing Naïve and COVID-19 previously exposed individuals.**

|                                                   |                                           | COVID-19<br>(n=22)     | Naïve<br>(n=48)       | P value              |
|---------------------------------------------------|-------------------------------------------|------------------------|-----------------------|----------------------|
| <b>Characteristics</b>                            |                                           |                        |                       |                      |
| Female, n (%)                                     |                                           | 17 (77.3)              | 19 (39.6)             | 0.0034*              |
| Age, mean                                         |                                           | 45.3                   | 39.0                  | 0.0688 <sup>‡</sup>  |
| Age, median (IQR)                                 |                                           | 45.5<br>(28.75 – 63)   | 37<br>(30 – 52)       |                      |
| Age, range                                        |                                           | 23 – 69                | 22 – 57               |                      |
| Income                                            | 0 – 3 minimum salaries                    | 6 (27.3)               | 7 (14.6)              | 0.0082*              |
|                                                   | 4 – 6 minimum salaries                    | 11 (50.0)              | 11 (22.9)             |                      |
|                                                   | > 6 minimum salaries                      | 5 (22.7)               | 30 (62.5)             |                      |
| Comorbidities, yes, n (%)                         |                                           | 15 (68.2)              | 25 (52.1)             | 0.2064*              |
| Diabetes                                          |                                           | 4 (18.2)               | 4 (8.3)               |                      |
| Hypertension                                      |                                           | 8 (36.4)               | 12 (25.0)             |                      |
| Obesity                                           |                                           | 3 (13.6)               | 10 (20.8)             |                      |
| Asthma                                            |                                           | 4 (18.2)               | 3 (6.25)              |                      |
| Cardiopathy or nephropathy                        |                                           | 1 (4.5)                | 2 (4.2)               |                      |
| <b>Serological testing</b>                        |                                           |                        |                       |                      |
| Before vaccination                                | Anti-Nucleocapsid IgG positive, n (%)     | 20<br>(90.9)           | 1<br>(2.1)            | <0.0001 <sup>‡</sup> |
|                                                   | Anti-Nucleocapsid IgG (RI), median (IQR)  | 5.24<br>(3.4–8.05)     | 0.92<br>(0.62–1.17)   | <0.0001 <sup>‡</sup> |
|                                                   | Anti-Spike-RBD IgG positive, n (%)        | 18<br>(81.8)           | 2<br>(4.2)            | <0.0001 <sup>‡</sup> |
|                                                   | Anti-Spike-RBD IgG (BAU/mL), median (IQR) | 108.1<br>(66.2–404.4)  | 10.34<br>(8.9– 12.4)  | <0.0001 <sup>‡</sup> |
|                                                   | RBD-ACE2 inhibition (%), median (95% IC)  | 24.56<br>(15.6–49.3)   | -0.54<br>(-3.2–1.5)   | <0.0001 <sup>‡</sup> |
|                                                   |                                           |                        |                       |                      |
| Peak response after fully vaccinated <sup>§</sup> | Anti-Nucleocapsid IgG positive, n (%)     | 22<br>(100.0)          | 33<br>(68.75)         | 0.0075 <sup>‡</sup>  |
|                                                   | Anti-Nucleocapsid IgG (RI), median (IQR)  | 8.93<br>(7.3–11.33)    | 3.04<br>(1.3–6.4)     | <0.0001 <sup>‡</sup> |
|                                                   | Anti-Spike-RBD IgG positive, n (%)        | 22<br>(100.0)          | 44<br>(91.7)          | 0.4811 <sup>‡</sup>  |
|                                                   | Anti-Spike-RBD IgG (BAU/mL), median (IQR) | 434.8<br>(222.8–735.6) | 172.0<br>(79.5–343.9) | 0.0104 <sup>‡</sup>  |
|                                                   | RBD-ACE2 inhibition (%), median (95% IC)  | 83.73<br>(64.4–95.7)   | 34.65<br>(17.05–61.5) | <0.0001 <sup>‡</sup> |
|                                                   |                                           |                        |                       |                      |

<sup>§</sup>15 days after second dose of vaccine was considered fully vaccinated. RI: Reactivity Index. BAU: binding antibodies units. IQR: interquartile. IgG: immunoglobulin G. RBD: receptor binding domain. ACE2: angiotensin-converting enzyme-2. <sup>‡</sup>Unpaired T test. \*Chi-square test.

**Supplementary Table S2. Characteristics and Serological testing comparing CoronaVac and AstraZeneca-vaccinated individuals.**

|                                           |                                           | CoronaVac<br>(n=67)    | AstraZeneca<br>(n=67) | P value  |
|-------------------------------------------|-------------------------------------------|------------------------|-----------------------|----------|
| <b>Characteristics</b>                    |                                           |                        |                       |          |
| Female, n (%)                             |                                           | 34 (50.75)             | 41 (61.2)             | 0.2232*  |
| Age, mean                                 |                                           | 40.78                  | 45.57                 | 0.0174†  |
| Age, median (IQR)                         |                                           | 37.0<br>(30.0 – 54.0)  | 46.0<br>(38.0 – 53.0) |          |
| Age, range                                |                                           | 22 – 69                | 25 – 69               |          |
| Income                                    | 0 – 3 minimum salaries                    | 12 (17.9)              | 7 (10.4)              | 0.3029*  |
|                                           | 4 – 6 minimum salaries                    | 21 (31.3)              | 18 (26.9)             |          |
|                                           | > 6 minimum salaries                      | 34 (50.8)              | 42 (62.7)             |          |
| Comorbidities, yes, n (%)                 |                                           | 38 (56.7)              | 42 (62.7)             | 0.4811*  |
|                                           | Diabetes                                  | 8 (11.9)               | 2 (3.0)               |          |
|                                           | Hypertension                              | 19 (28.4)              | 7 (10.4)              |          |
|                                           | Obesity                                   | 12 (17.9)              | 6 (9.0)               |          |
|                                           | Asthma                                    | 5 (7.5)                | 6 (9.0)               |          |
|                                           | Cardiopath or nephropath                  | 2 (3.0)                | 1 (1.5)               |          |
|                                           | Hypothyroidism                            | 1 (1.5)                | 1 (1.5)               |          |
|                                           | Neoplasms or Immunosuppressions           | 2 (3.0)                | 4 (6.0)               |          |
| COVID-19 prior to vaccination, yes, n (%) |                                           | 20 (29.9)              | 33 (49.3)             | 0.0216*  |
| <b>Serological testing</b>                |                                           |                        |                       |          |
| After fully vaccinated§                   | Anti-Spike-RBD IgG positive, n (%)        | 63 (94.0)              | 67 (100.0)            | 0.0423†  |
|                                           | Anti-Spike-RBD IgG (BAU/mL), median (IQR) | 175.9<br>(110.5–420.1) | 621.9<br>(318.5–1115) | 0.0013†  |
|                                           | RBD-ACE2 inhibition (%)                   | 47.12<br>(34.5–60.1)   | 88.92<br>(77.8–93.7)  | <0.0001† |
|                                           | RBD-ACE2 inhibition (%), median (95% IC)  |                        |                       |          |

§15 days after second dose of vaccine was considered fully vaccinated. BAU: binding antibodies units. IQR: interquartile. IgG: immunoglobulin G. RBD: receptor binding domain. ACE2: angiotensin-converting enzyme-2. †Unpaired T test. \*Chi-square test.

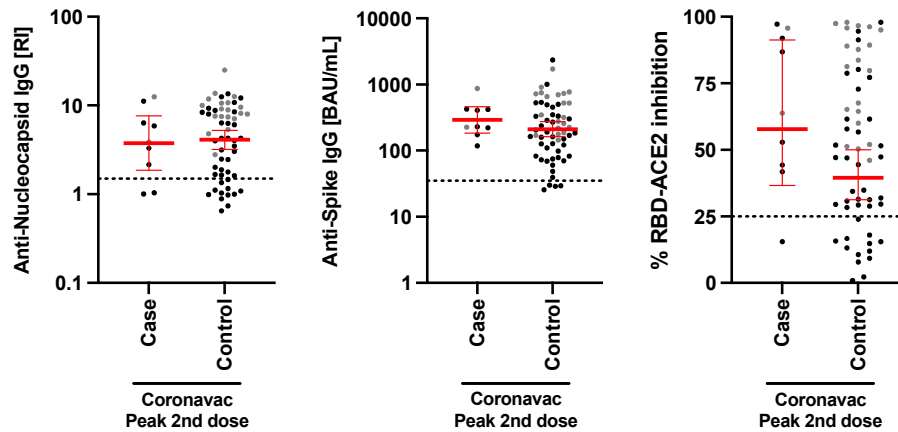

**Supplementary Figure S1: Equivalent humoral response between Sinovac-CoronaVac vaccine breakthrough cases and controls.**

Symptomatic vaccine breakthrough cases (n=9) were paired with age, sex, time of vaccination and previous COVID-19 history to vaccinated controls (n=61) without breakthrough infection during the same period. Immunoassays measured serum anti-nucleocapsid IgG, anti-Spike-RBD IgG and %RBD-ACE2 inhibitory antibodies before and after immunization. Peak humoral response after two doses. Median is represented by red horizontal lines. Horizontal dotted lines represent assay cut-off. Each patient represents one data point in the graph.

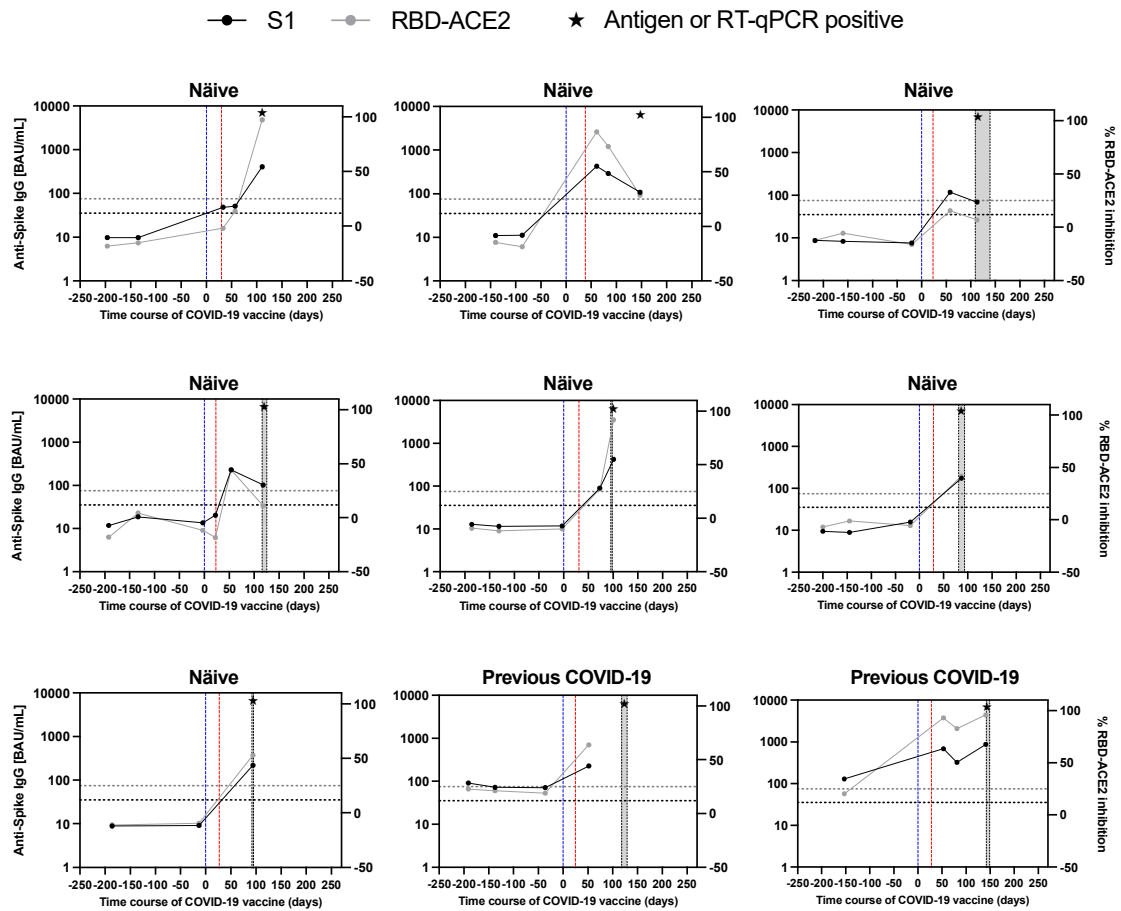

### Supplementary Figure S2: Breakthrough cases

Each graph represents one symptomatic patient diagnosed after two doses of Sinovac-CoronaVac vaccine. Left and right X-axis depict anti-Spike-RBD IgG and %RBD-ACE2 inhibitory antibodies, respectively. Grey-line and black-line in graphs represents anti-Spike-RBD IgG and %RBD-ACE2 inhibitory antibodies, respectively. Blue vertical line represents first dose and red-line second vaccine dose. Asterisk depicts day tested positive by RT-PCR for SARS-CoV-2. Grey-area depicts days with symptoms.

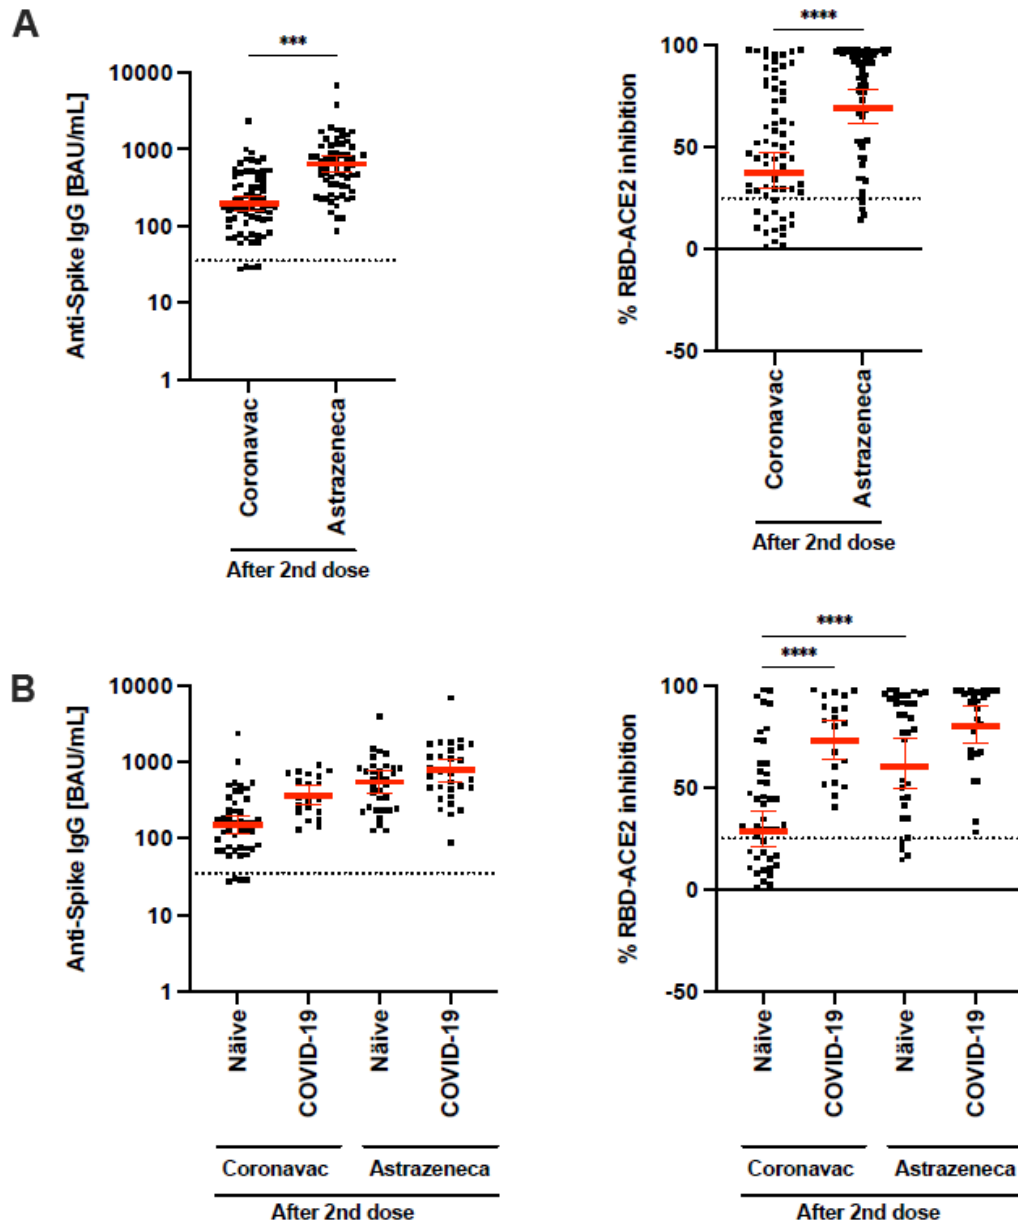

**Supplementary Figure S3: Adenovirus-vectored SARS-CoV-2 vaccine response was superior to inactivated SARS-CoV-2 vaccine response.** Immunoassays measured anti-Spike-RBD IgG and %RBD-ACE2 inhibitory antibodies before and after immunization. (A) Peak humoral response after two doses among Sinovac-CoronaVac (n=61) and AstraZeneca (n=66) vaccine was compared. (B) Vaccinees were stratified as naïve and infected individuals to compare humoral response compared. Median is represented by red horizontal lines. Horizontal dotted lines represent assay cut-off. Each patient represents one data point in the graph. One-way ANOVA test with Tukey's post hoc test was used. \*\*\*  $p < 0.001$ , \*\*\*\*  $p < 0.0001$ .
